# Supplementary material
Source: publisher figshare collection journal article supplement (https://acs.figshare.com/ndownloader/files/3821437)
Supplement: Supplementary file 1 [file 3821437]

# Supporting Information:

## Converting a light-driven proton pump into a light-gated proton channel

Keiichi Inoue, Takashi Tsukamoto, Kazumi Shimono, Yuto Suzuki, Seiji Miyauchi,  
Shigehiko Hayashi, Hideki Kandori, Yuki Sudo\*.

\*correspondence to: [sudo@pharm.okayama-u.ac.jp](mailto:sudo@pharm.okayama-u.ac.jp)

**Table S1.** Absorption maxima, opsin shifts and retinal configurations of the wild-type AR3 and its mutants.

**Table S2.** Absorption maxima, opsin shifts, retinal configurations and directions of the proton pumping of the wild-type *Hw*BR and the triple mutant.

**Table S3.** Absorption maxima, opsin shifts, retinal configurations and directions of the proton pumping of the wild-type GR and the triple mutant.

**Figure S1.** Difference FTIR spectra of wild-type AR3 and AR3-T (middle) and the chimeric ChR (C1C2) in 1595-850 cm<sup>-1</sup> region.

**Figure S2.** The correlation of the absorption maxima ( $\lambda_{\text{max}}$ s) and the frequencies of retinal C=C stretching vibrations of microbial rhodopsins.

**Figure S3.** Transient absorption spectra of wild-type AR3 and AR3-T in the *E. coli* membrane.

**Figure S4.** The absorption spectra and proton transport activity of wild-type *Hw*BR, GR and their mutants.

### Supporting Information References

(49) Kandori, H.; Shimono, K.; Sudo, Y.; Iwamoto, M.; Shichida, Y.; Kamo, N., *Biochemistry* **2001**, *40*, 9238.

**Table S1.** Absorption maxima ( $\lambda_{\max}$ ), opsin shifts ( $\Delta\nu$ ) and retinal configurations of the wild-type AR3 and its mutants.  $\Delta\Delta\nu$  indicates the difference from the value expected from the sum of  $\Delta\nu$ s of single mutations comprising respective double and triple mutants.

| Opsin type        | $\lambda_{\max}$<br>[nm] | $\Delta\nu$ [cm <sup>-1</sup> ] | $\Delta\Delta\nu$ [cm <sup>-1</sup> ] | ATR [%]             |
|-------------------|--------------------------|---------------------------------|---------------------------------------|---------------------|
| wild-type         | 552 <sup>a</sup>         | -                               | -                                     | 53 ± 2 <sup>a</sup> |
| M128A             | 536 <sup>a</sup>         | 541 <sup>a</sup>                | -                                     | 68 ± 1 <sup>a</sup> |
| G132V             | 526                      | 895                             | -                                     | 65 ± 3              |
| A225T             | 540                      | 403                             | -                                     | 70 ± 2              |
| M128A/A225T       | 518                      | 1189                            | 245                                   | 51 ± 3              |
| G132V/A225T       | 508                      | 1569                            | 271                                   | 75 ± 2              |
| M128A/G132V/A225T | 455                      | 3862                            | 2023                                  | 65 ± 3              |

<sup>a</sup> From Sudo et al., (2013) J. Biol. Chem., n.d. = not determined.

**Table S2.** Absorption maxima ( $\lambda_{\max}$ ), opsin shifts ( $\Delta\nu$ ), retinal configurations and directions of the proton pumping of the wild-type *HwBR* and the triple mutant.

| Opsin type        | $\lambda_{\max}$<br>[nm] | $\Delta\nu$ [cm <sup>-1</sup> ] | ATR [%]             | Direction            |
|-------------------|--------------------------|---------------------------------|---------------------|----------------------|
| wild-type         | 552 <sup>a</sup>         | -                               | 79 ± 2 <sup>a</sup> | Outward <sup>a</sup> |
| M126A/G130V/A223T | 472                      | 3070                            | 70 ± 1              | Inward               |

<sup>a</sup> From Sudo et al., (2013) J. Biol. Chem.,

**Table S3.** Absorption maxima ( $\lambda_{\max}$ ), opsin shifts ( $\Delta\nu$ ), retinal configurations and directions of the proton pumping of the wild-type GR and the triple mutant.

| Opsin type        | $\lambda_{\max}$<br>[nm] | $\Delta\nu$ [cm <sup>-1</sup> ] | ATR [%] | Direction |
|-------------------|--------------------------|---------------------------------|---------|-----------|
| wild-type         | 540                      | -                               | 90 ± 2  | Outward   |
| M158A/G162V/A256T | 474                      | 2579                            | 64 ± 3  | Outward   |

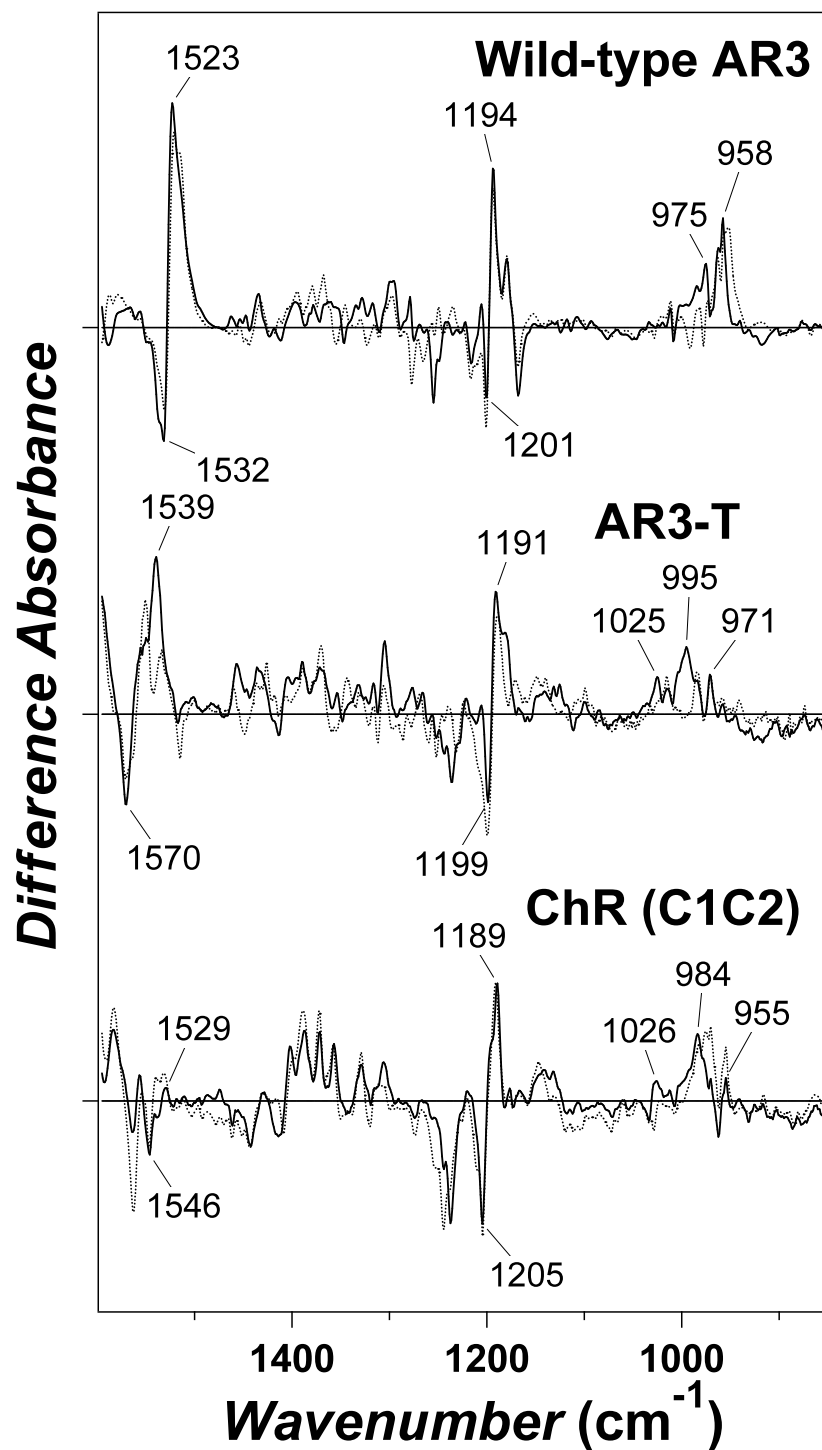

**Fig. S1.**

**Difference FTIR spectra of wild-type AR3 and AR3-T and ChR (C1C2) in the 1595-850  $\text{cm}^{-1}$  region.** Difference FTIR spectra of wild-type AR3 (upper), AR3-T (middle) and the chimeric ChR (C1C2) (lower, reproduced from Ref.<sup>15</sup>) at 77K in the 1595-850  $\text{cm}^{-1}$  region. Solid and dotted lines are the spectra of films hydrated with  $\text{H}_2\text{O}$  and  $\text{D}_2\text{O}$ , respectively.

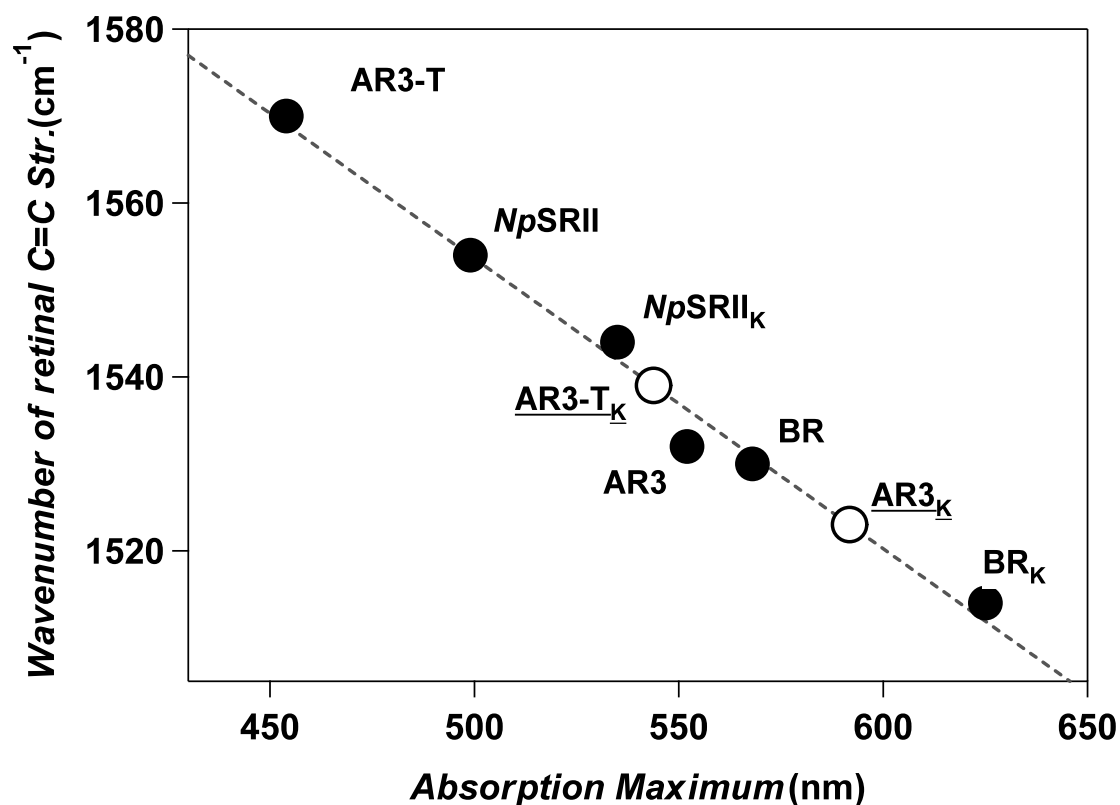

Fig. S2.

**Correlation of the absorption maxima ( $\lambda_{\max}$ ) and vibrational frequencies of retinal C=C stretching vibrations of microbial rhodopsins.** The reported values for BR, NpSRII, the K intermediate of BR (BR<sub>K</sub>) and NpSRII (NpSRII<sub>K</sub>) and the values for AR3 and AR3-T in the dark determined in this study are shown by filled circles<sup>49</sup>. The wavenumbers of retinal C=C stretching vibration of AR3<sub>K</sub> and AR3-T<sub>K</sub> (open circles) were calculated with their  $\lambda_{\max}$ s and the linear regression curve for the data shown by filled circles (dashed line).

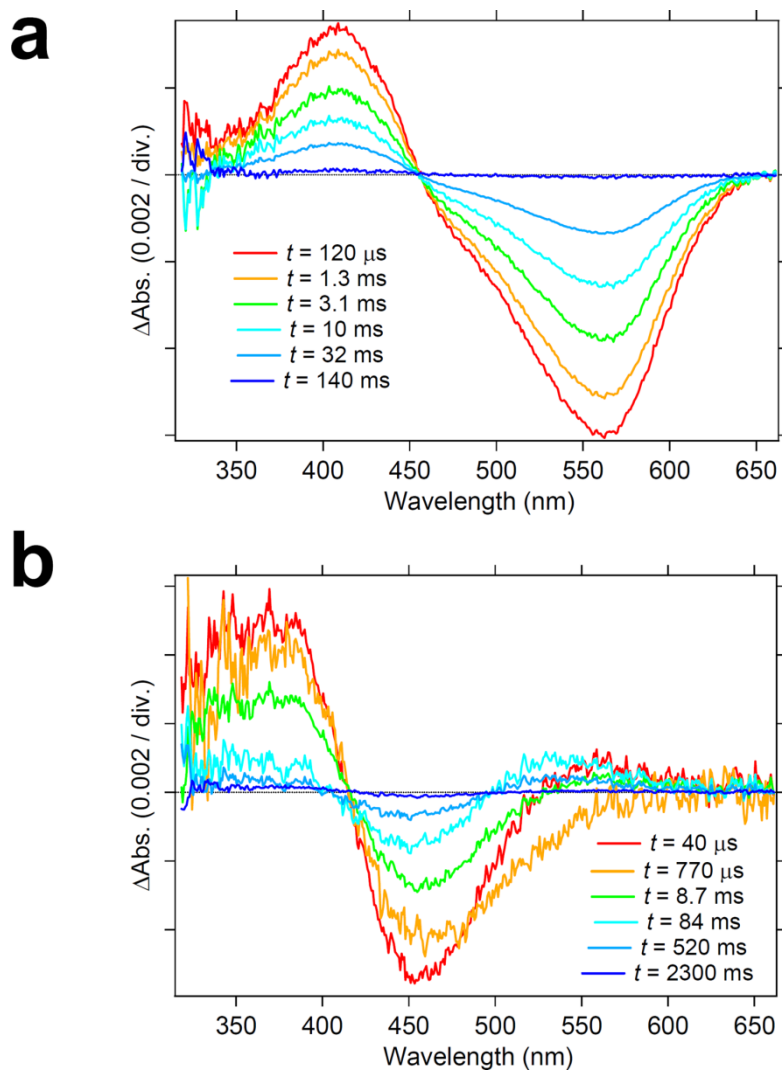

**Fig. S3.**

**Transient absorption spectra of wild-type AR3 and AR3-T in the *E. coli* membrane.** (a) Transient absorption spectra of wild-type AR3 at  $t = 120 \mu\text{s}$  to 140 ms. (b) Transient absorption spectra of AR3-T at  $t = 40 \mu\text{s}$  to 2,300 ms.

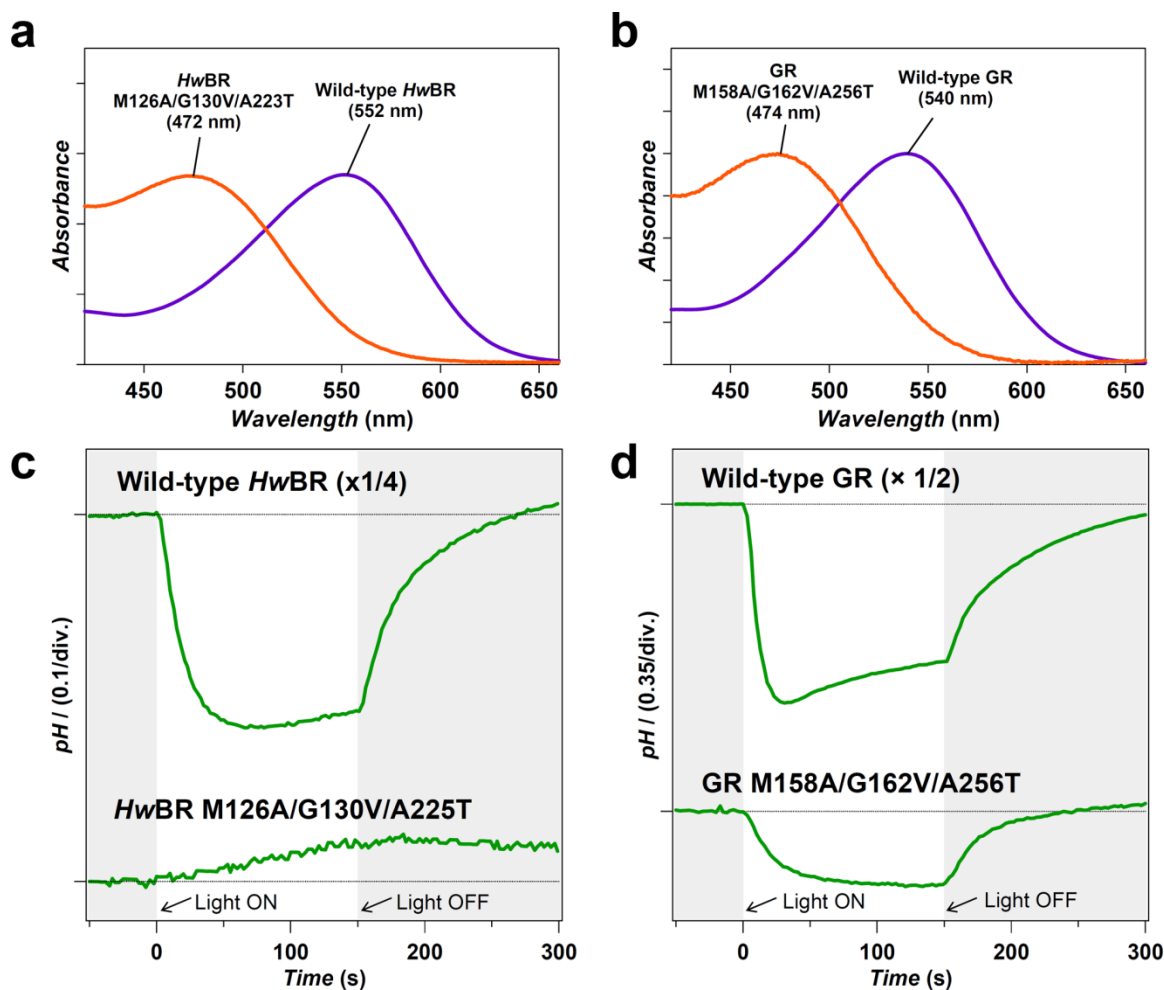

**Fig. S4.**

**Absorption spectra and proton transport activity of *HwBR*, GR and their mutants.** (a and b) Absorption spectra of *HwBR* and its triple mutant (a) and GR and its triple mutant (b). (c and d) Proton transport activity of wild-type *HwBR* and its triple mutant (M126A/G130V/A225T) (c), and wild-type GR and its triple mutant (M158A/G162V/A256T) (d).
